# Supplementary material for: Binder-free germanium nanoparticle decorated multi-wall carbon nanotube anodes prepared via two-step electrophoretic deposition for high capacity Li-ion batteries
Source: Royal Society of Chemistry journal article supplement (doi:10.1039/d3nh00501a), 2024-01-01
Supplement: d3nh00501a1.pdf [file d3nh00501a1.pdf]

## Electronic Supplementary Information

# **Binder-Free Germanium Nanoparticle decorated Multi-Wall Carbon Nanotube Anodes prepared via two-step Electrophoretic Deposition for high capacity Li-Ion Batteries**

Xuan-Manh Pham, Syed Abdul Ahad, Niraj Nitish Patil, Hugh Geaney, Shalini Singh, Kevin M. Ryan\*

Department of Chemical Sciences and Bernal Institute, University of Limerick, Limerick, Ireland

E-mail: [Kevin.M.Ryan@ul.ie](mailto:Kevin.M.Ryan@ul.ie)

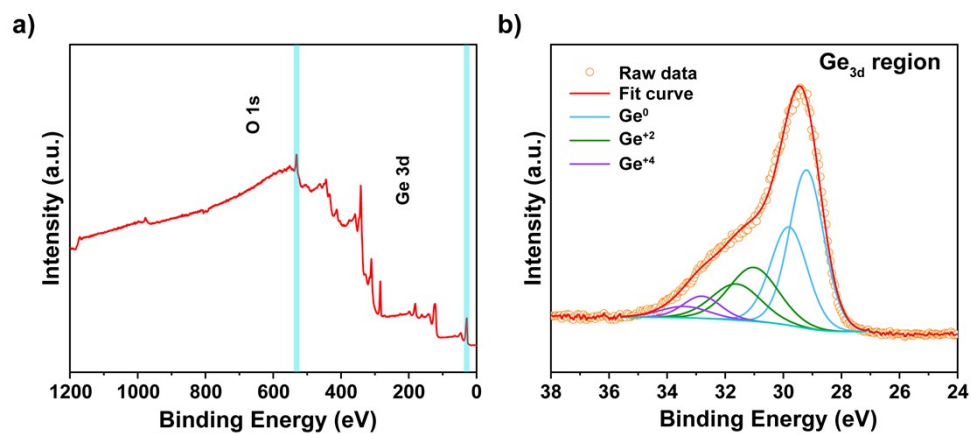

**Fig. S1** XPS spectra of Ge NPs: (a) wide scan spectrum and core peaks corresponding to (b) Ge 3d.

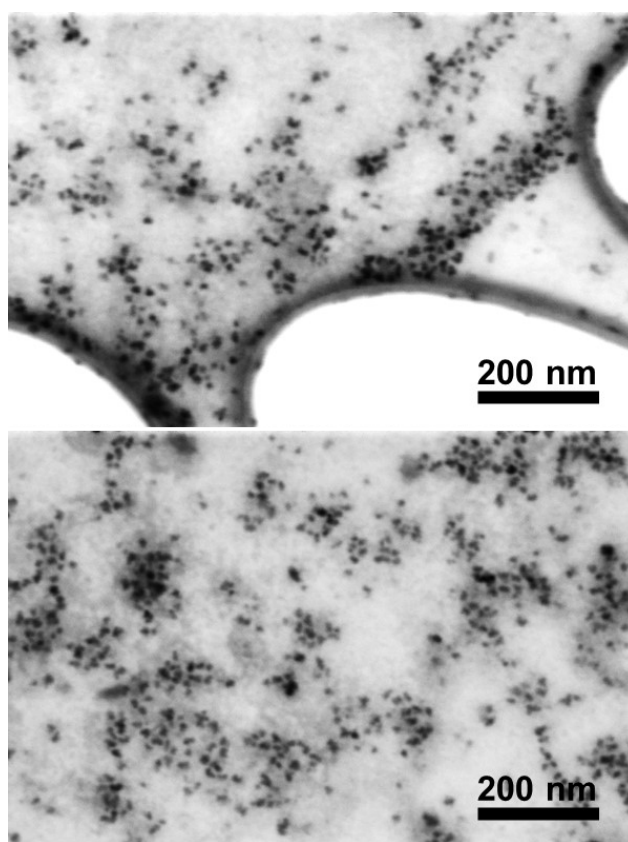

**Fig. S2** STEM images (bright mode) of Ge NPs.

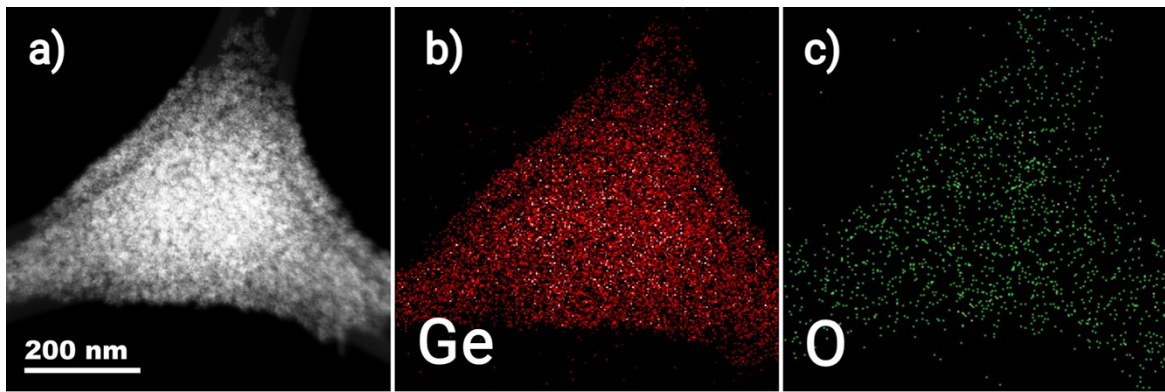

**Fig. S3** (a) STEM of Ge NPs and (b, c) EDS mapping of Ge and O elements.

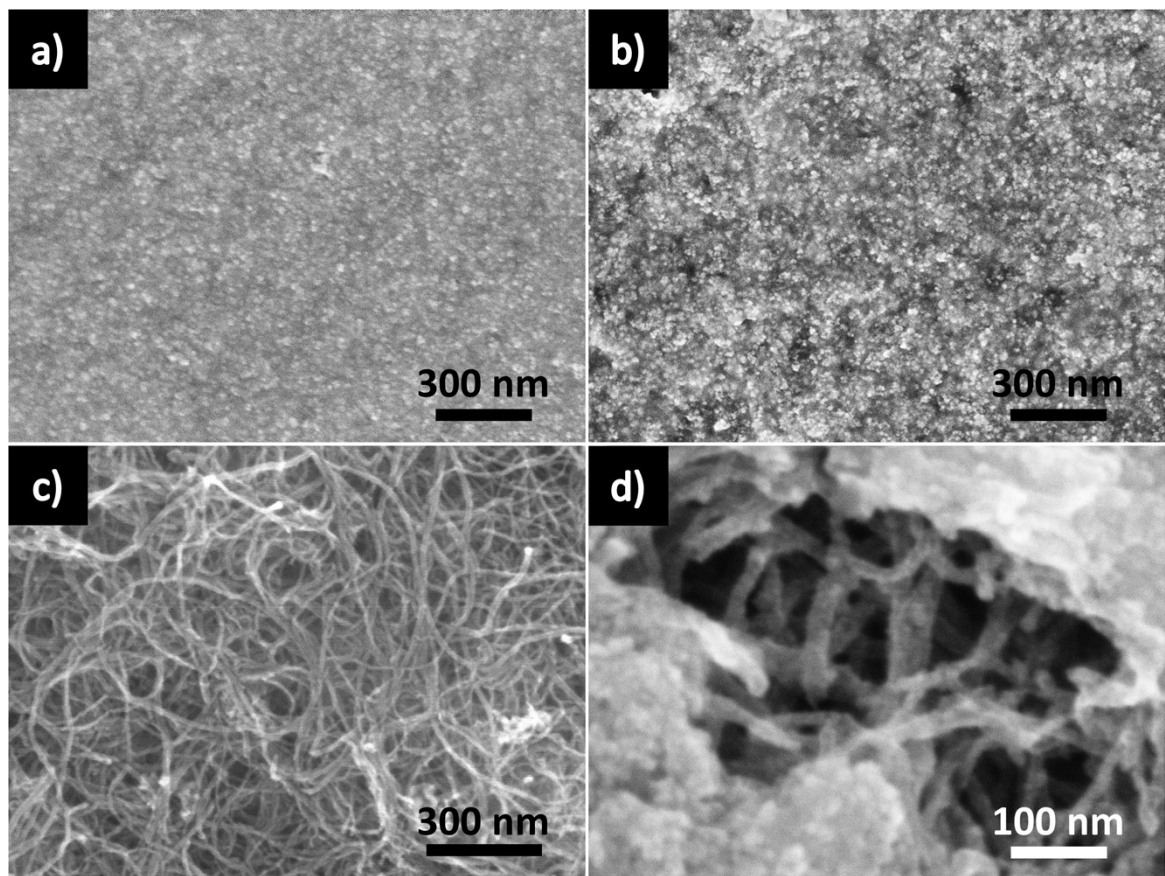

**Fig. S4** HR-SEM images of (a) Ge and (b) CNT and (c, d) Ge/CNT deposited by EPD

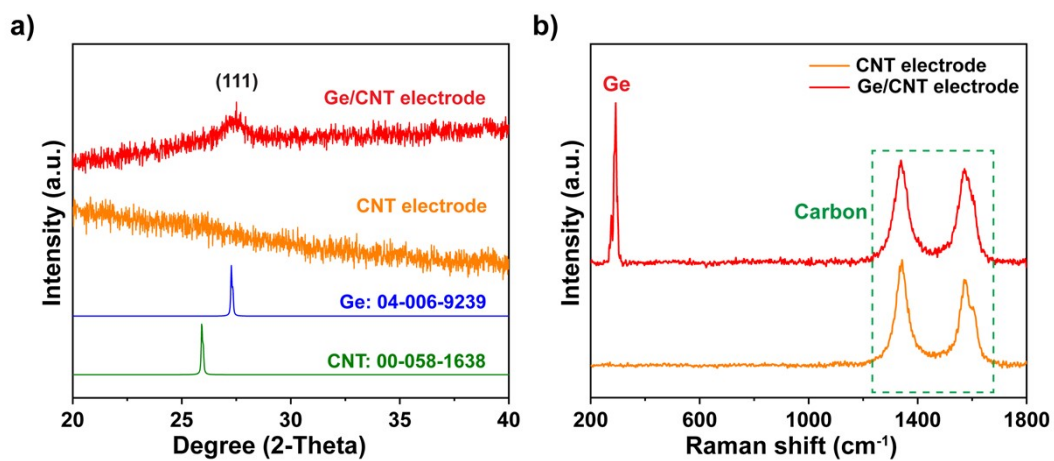

Fig. S5 (a) XRD and (b) Raman spectra of CNT and Ge/CNT electrodes fabricated by EPD.

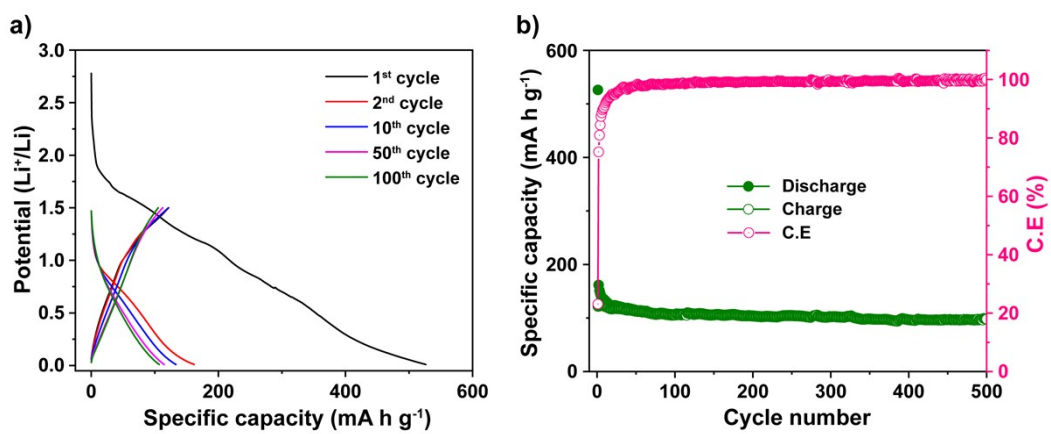

Fig. S6 (a) Discharge-Charge profiles and (b) cycling performance at C/5 of CNT electrode.

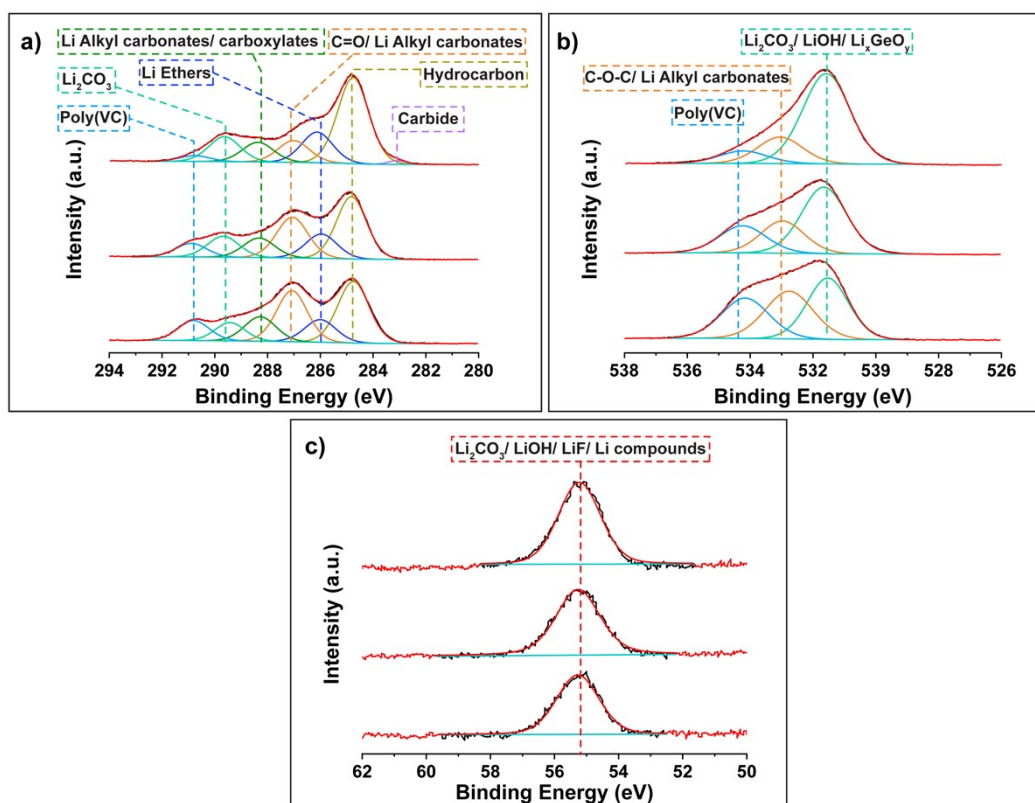

**Fig. S7** (a) High-resolution C 1s spectra, b) High-resolution O 1s spectra and c) Li 1s of Ge, Ge/CNT-1 and CNT electrodes after 5 cycles.

The chemical composition of the SEI layer of each electrode after 5 discharge/charge cycles was investigated using XPS analysis. The XPS data revealed that the SEI layer mainly comprises C, O, and Li-containing compounds (Fig. S7). Ge is only found in trace amounts signifying that the thickness of the SEI layer is greater than 10 nm as this is the maximum depth of penetration of XPS. The deconvoluted C<sub>1s</sub> spectrum (Fig. S7a) shows the composition of SEI layers on all electrodes consists mainly of hydrocarbons, Li ethers, Li alkyl carbonates, Li<sub>2</sub>CO<sub>3</sub> and poly(VC) (the electrolyte additive). The most intense peak in each C 1s spectrum occurs at 284.8 eV, assigned to hydrocarbon species in the SEI layer such as alkyl groups.<sup>1,2</sup> The peaks at 287.1, 288.3, and 288.7 eV correspond to the carbonate species (i.e. Li<sub>2</sub>CO<sub>3</sub> and Li alkyl carbonates).<sup>1-4</sup> Other peaks located at 286 and 290.9 eV are associated with Li ethers and polyVC, respectively.<sup>2,4,5</sup> One extra peak exists at 283.1 eV in the CNT electrode, corresponding to Li<sub>x</sub>C (carbide).<sup>6-8</sup> Analysis of the deconvoluted high-resolution O 1s spectra (Fig. S7b) reveals the presence of a peak for the poly(VC) at 534.2 eV due to the presence of VC which is consistent with the C 1s spectrum. For all electrodes, peaks exist due to the presence of Li<sub>2</sub>CO<sub>3</sub>/LiOH/Li<sub>x</sub>GeO<sub>y</sub> (531.6 eV), and the Li alkyl carbonates (533.1 eV).<sup>2,4,9</sup> The deconvoluted Li 1s spectrum (Fig. S7c) shows the

existence of LiOH/Li<sub>2</sub>CO<sub>3</sub>/LiF/Li compounds in the SEI layers of all electrodes.<sup>2, 4, 9</sup> The relative concentrations of each atomic species, corresponding to XPS analysis are shown in Table S1. The relative concentrations of Li 1s (Ge sample) is 13.1%, which is lower than the values of the Ge/CNT-1 (16.1%) and CNT (19.7%) samples. This demonstrates that a considerable amount of Li is consumed in the SEI formation of Ge/CNT-1 and CNT electrodes, resulting in the low CE during a few first cycles.

**Table S1** Quantification of each atomic from Survey Spectra

| Sample   | Atomic % |      |      |      |       |
|----------|----------|------|------|------|-------|
|          | O 1s     | C 1s | F 1s | P 2p | Li 1s |
| Ge       | 38.2     | 41.3 | 5.0  | 2.4  | 13.1  |
| Ge/CNT-1 | 35.9     | 41.0 | 5.4  | 1.6  | 16.1  |
| CNT      | 34.7     | 38.7 | 5.8  | 1.1  | 19.7  |

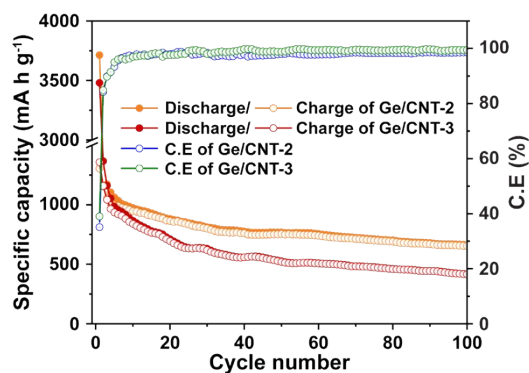

**Fig. S8** Cyclability of Ge/CNT-2 and Ge/CNT-3 electrodes.

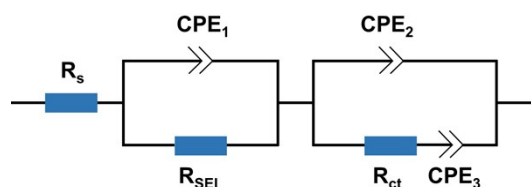

**Fig. S9** Equivalent circuit used for fitting of EIS data.

The equivalent circuit includes  $R_s$ ,  $R_{SEI}$ , and  $R_{ct}$  which indicate the resistance of the electrolyte, the resistance of the SEI layer and the charge transfer resistance, respectively.  $CPE_1$ ,  $CPE_2$ , and  $CPE_3$  denote the capacitances corresponding to the charge-transfer process.

**Table S2** Tabulation of  $R_s$ ,  $R_{SEI}$  and  $R_{ct}$  value of Ge/CNT-1 and Ge at different cycle no. cycled.

| Electrode | Ge/CNT-1           |                        |                       | Ge                 |                        |                       |
|-----------|--------------------|------------------------|-----------------------|--------------------|------------------------|-----------------------|
| Cycle     | $R_s$ ( $\Omega$ ) | $R_{SEI}$ ( $\Omega$ ) | $R_{ct}$ ( $\Omega$ ) | $R_s$ ( $\Omega$ ) | $R_{SEI}$ ( $\Omega$ ) | $R_{ct}$ ( $\Omega$ ) |
| 1st       | 9.66               | 114.7                  | 457                   | 9.88               | 87.58                  | 1194                  |
| 10th      | 7.14               | 115.8                  | 457.2                 | 6.6                | 90.08                  | 1251                  |
| 100th     | 6.34               | 143.8                  | 553.4                 | 5.21               | 145.5                  | 6600                  |

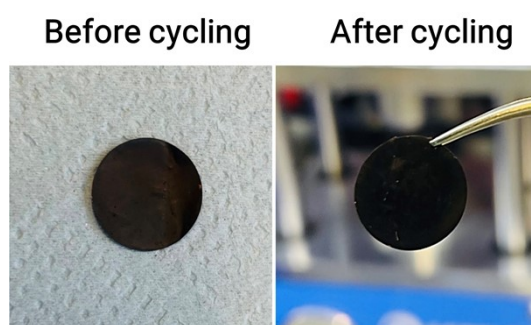

**Fig. S10** Optical images of Ge/CNT-1 before and after cycling.

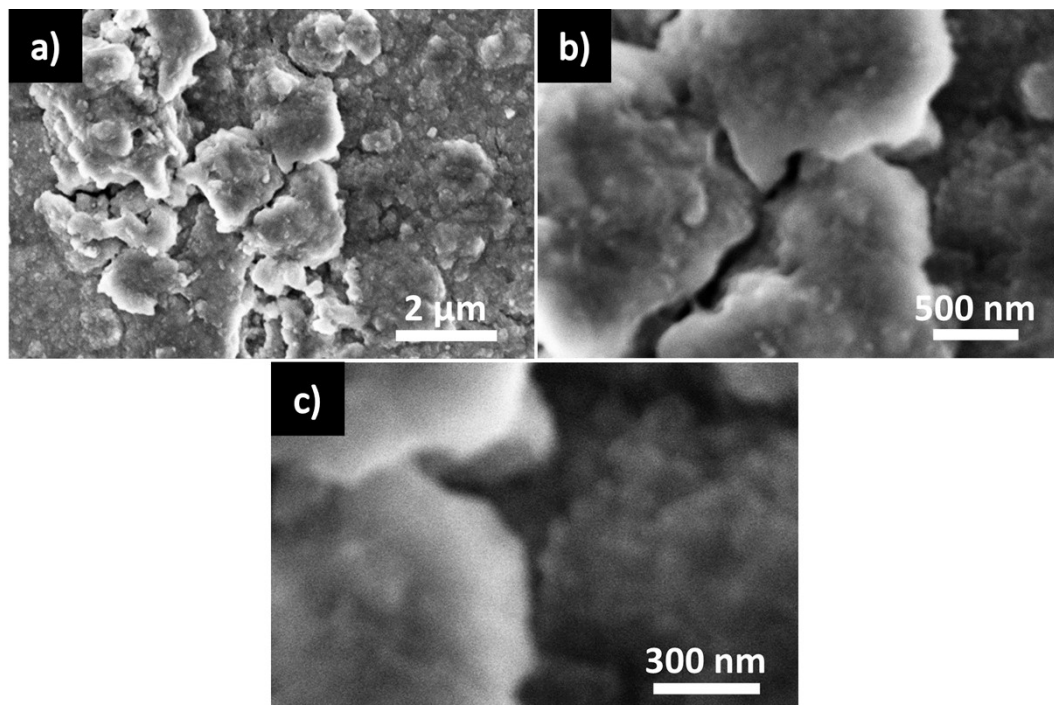

**Fig. S11** SEM images (top view) of Ge electrode after 100 cycles.

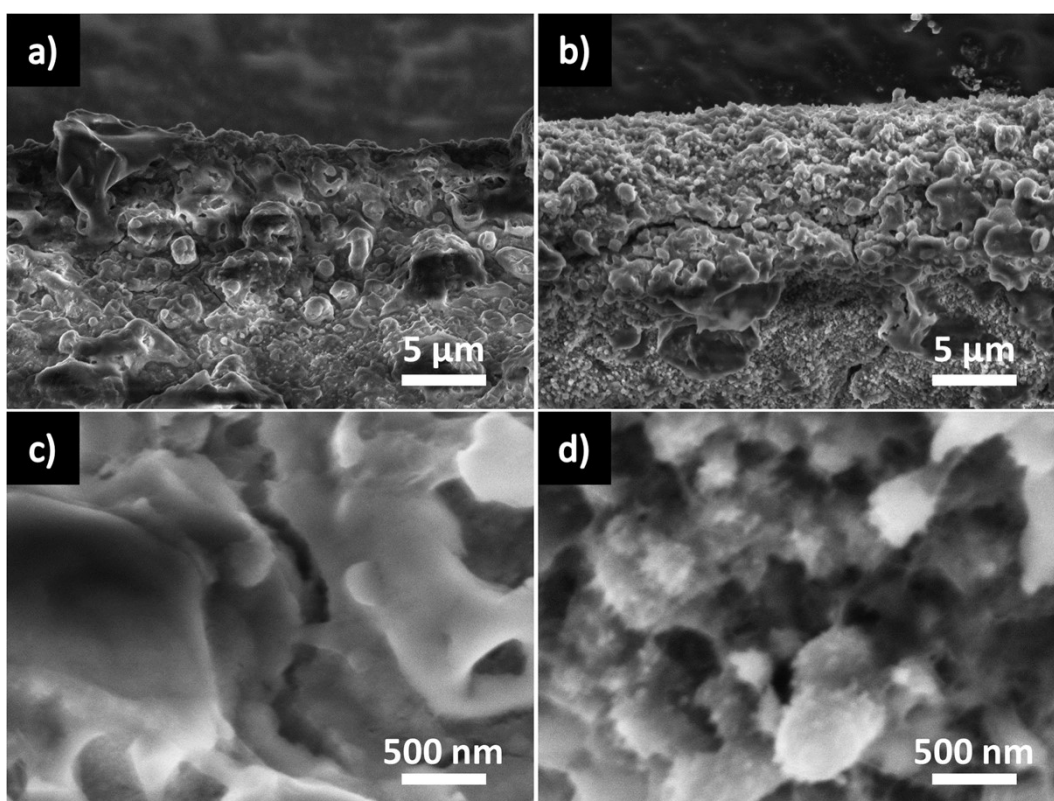

**Fig. S12** SEM images (side view) of (a, c) Ge electrode and (b, d) Ge/CNT-1 electrode after 100 cycles.

The side-view SEM images of Ge electrode (Fig. S12a, c) further show the agglomeration of Ge NPs after cycling. In contrast, SEM images of Ge/CNT-1 (Fig. S12b, d) display that the Ge NPs were embedded by the CNT network, accommodating the impact of the volume expansion and agglomeration.



## References

1. P. Verma, P. Maire and P. Novák, *Electrochim. Acta*, 2010, **55**, 6332-6341.
2. S. S. Zhang, *J. Power Sources*, 2006, **162**, 1379-1394.
3. T. Kennedy, M. Brandon, F. Laffir and K. M. Ryan, *J. Power Sources*, 2017, **359**, 601-610.
4. D. Aurbach, K. Gamolsky, B. Markovsky, Y. Gofer, M. Schmidt and U. Heider, *Electrochim. Acta*, 2002, **47**, 1423-1439.
5. L. El Ouatani, R. Dedryvère, C. Siret, P. Biensan, S. Reynaud, P. Iratçabal and D. Gonbeau, *J. Electrochem. Soc.*, 2009, **156**, A103.
6. I. Weber, J. Kim, F. Buchner, J. Schnaidt and R. J. Behm, *ChemSusChem*, 2020, **13**, 2589-2601.
7. H. Q. Pham, M. Mirolo, M. Tarik, M. El Kazzi and S. Trabesinger, *Energy Storage Mater.*, 2020, **33**, 216-229.
8. Z. Yang, S. E. Trask, X. Wu and B. J. Ingram, *Batteries*, 2023, **9**, 138.
9. A. Lahiri, G. Li, M. Olschewski and F. Endres, *ACS Appl. Mater. Interfaces*, 2016, **8**, 34143-34150.
